# Supplementary material
Source: publisher figshare collection journal article supplement (https://aacr.figshare.com/articles/dataset/_/22431624)
Supplement: Supplementary file 1 [file 39877986]

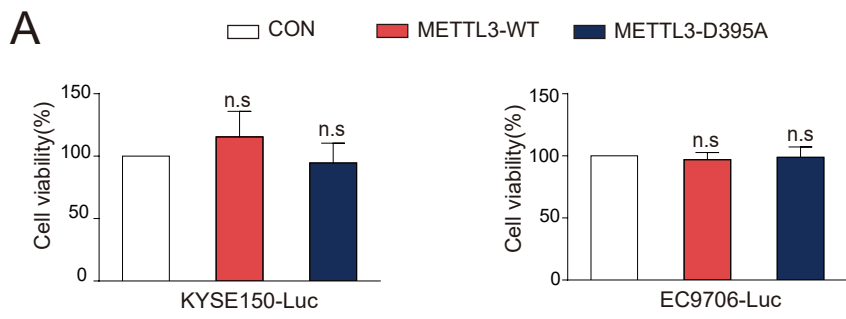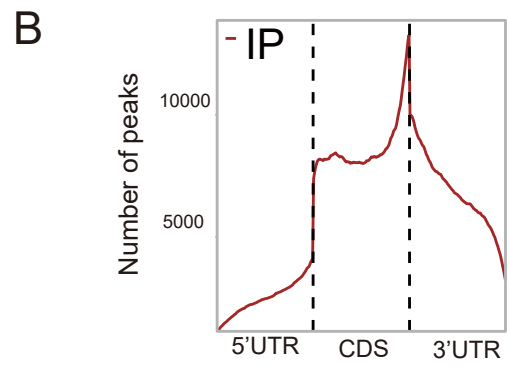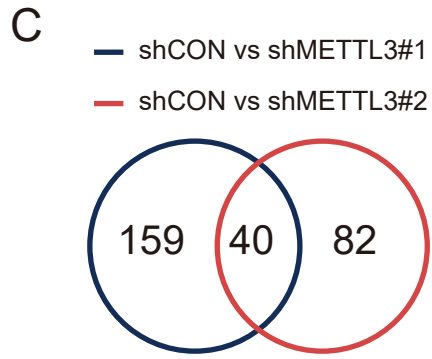

**D**

| Gene_name     | Literature Metastasis (Pubmed) |
|---------------|--------------------------------|
| EGR1          | 121                            |
| TNS4          | 15                             |
| ERCC5         | 9                              |
| PAK6          | 6                              |
| MGLL          | 3                              |
| CKMT1B        | 1                              |
| EIF3CL        | 0                              |
| KRT86         | 0                              |
| POC1B-GALNT4  | 0                              |
| SYNJ2BP-COX16 | 0                              |
| RNF103-CHMP3  | 0                              |
| BCL2L2-PABPN1 | 0                              |
| BUB1B-PAK6    | 0                              |
| TGIF2-RAB5IF  | 0                              |
